# Supplementary material for: Endo-β-1,3-glucanase (GH16 Family) from Trichoderma harzianum Participates in Cell Wall Biogenesis but Is Not Essential for Antagonism Against Plant Pathogens
Source: PubMed Central journal article supplement (PMC6995588; doi:10.3390/biom9120781), 2019-11-26
Supplement: biomolecules-09-00781-s001.pdf [file biomolecules-09-00781-s001.pdf]

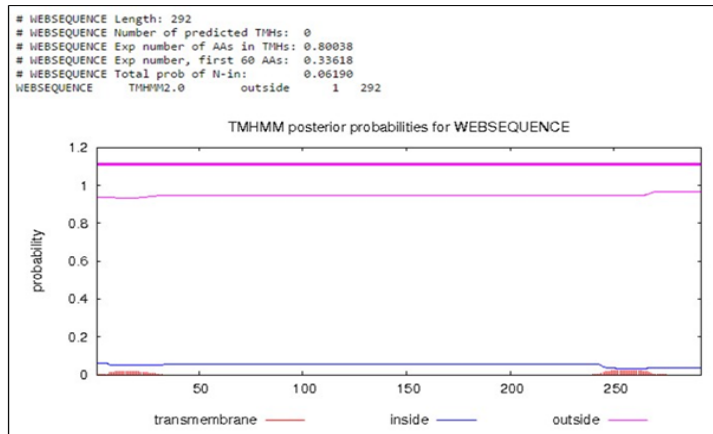

**Supplementary Figure 1.** Prediction of a probable transmembrane helices localization and orientation. The vertical line (red) indicates the probable transmembrane sites; line parallel to x-axis indicates the probable sites membrane inside (blue) or membrane outside (pink).

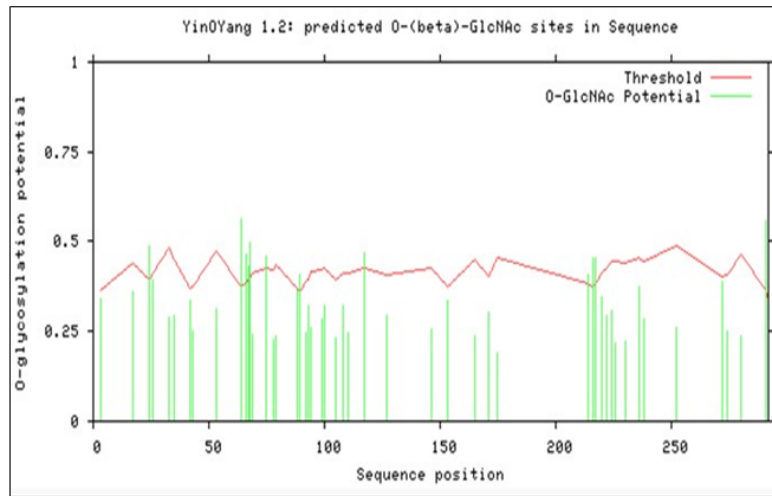

**Supplementary Figure 2.** O- $\beta$ -GlcNAc prediction of the  $\beta$ -1,3-glucanase aminoacid sequence. The x-axis represents to N-terminal sequence for C-terminal. Vertical lines (green) are potential O-GlcNAc sites. The threshold potential is represented by the horizontal line (red). The site with vertical lines (green) that crossed the threshold line are considered site predicted for O- GlcNAc sites.

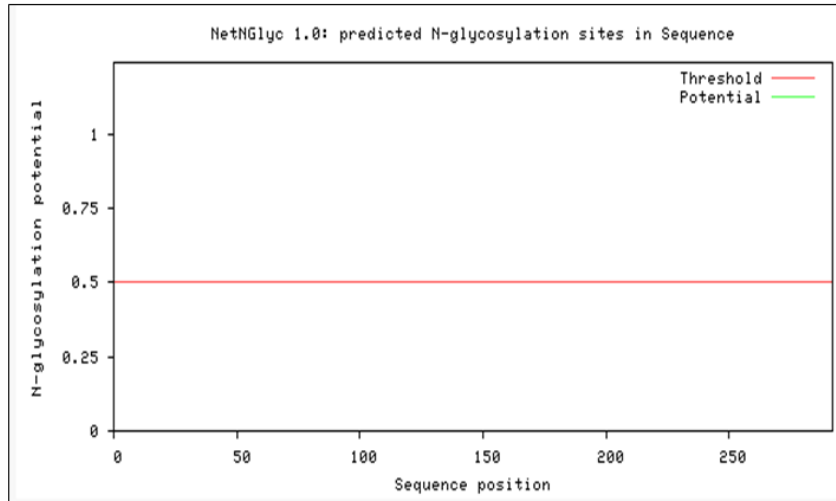

**Supplementary Figure 3.** Prediction *N*-glic sites of the  $\beta$ -1,3-glucanase aminoacid sequence. X-axis represents protein length from N- to C-terminal. A position with a potential (vertical line) crossing the threshold line (red) is predicted glycosylated.

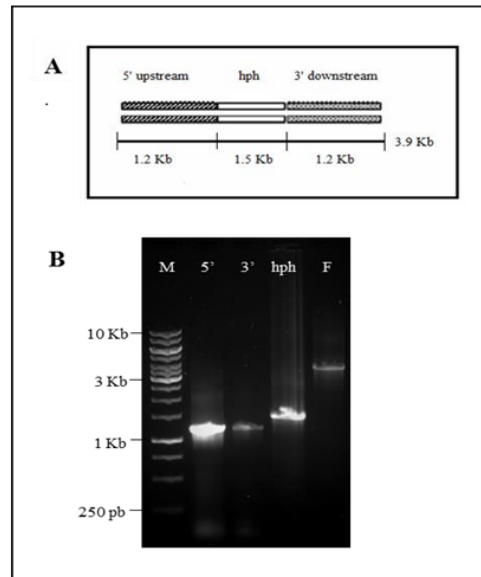

**Supplementary Figure 4.** Deletion cassette of *T.harzianum* glucanase. **(A)**. Scheme of deletion cassette showing expected size for each region separately and after fragments fusion. **(B)**. Evaluation of size amplified fragments in 1% agarose gel. M: 1Kb molecular marker; 5': flanking region 5' upstream; 3': flanking region 3' downstream; F: fusion product of three fragments (deletion cassette).

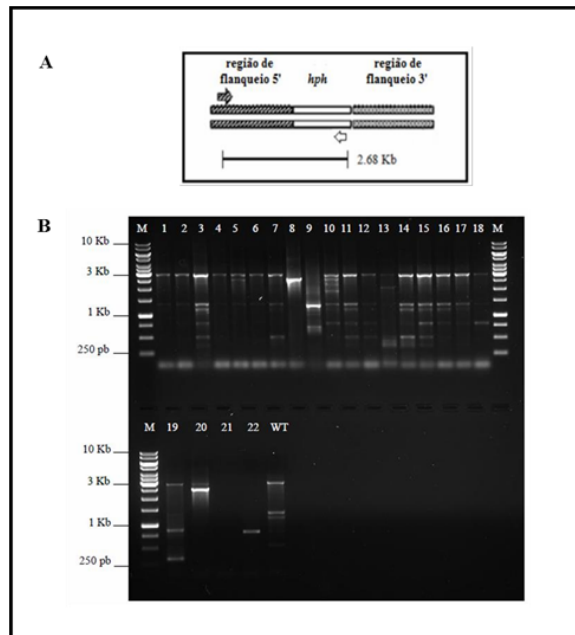

**Supplementary Figure 5. (A).** Analysis of transformants by PCR. Strategy used to confirm PCR replacement of the *gluc31* gene by the *hph* marker gene. For amplification of the 2.68 Kb fragment, specific primers were used for the 5' upstream region and for the hygromycin region. **B).** Fragments amplified in 1% agarose gel. Transformant 8 and 20 indicated the expected amplification size. M: 1Kb molecular marker; 1 to 22: transformants; WT: wildlineage.

**Supplementary Tabela S1:** Primers used in the deletion strategy of the *gluc31* gene of

*T. harzianum*.

| Gene          | Oligonucleotídeos | Sequencia                                           | Amplicon (pb) |
|---------------|-------------------|-----------------------------------------------------|---------------|
| Endoglucanase | Del_5F            | CTCCGGGGCGGCAATCCCAAGTTGATAGTAC                     | 1214          |
|               | Del_5R            | ATCCACTTAACGTTACTGAAATCTCCAACGCCATTGTCATCCGTGATA    |               |
|               | Del_3F            | CTCCTTCAATATCATCTTCTGTCTCCGACCATGCGATACCACAGTACATAA | 1214          |
|               | Del_3R            | GGATACCTGGTTGACCCGGAGAGGCG                          |               |
|               | Nested 5R         | GTGATGGAAGATGGTGTGGAG                               | 3494          |
|               | Nested 3F         | CGCAGGGTAACTAGCTACAACAT                             |               |
| Higromicina   | Hyg_5F            | GTCGGAGACAGAAGATGATATTGAAGGAGC                      | 1432          |
|               | Hyg_3R            | GTTGGAGATTCAGTAACGTTAAGTGGAT                        |               |

**Supplementary Tabela S2.** Primers used in Gene Expression Analysis by Real-Time PCR.

| Gene                  | Primer                      | Sequence                        |
|-----------------------|-----------------------------|---------------------------------|
| Endoglucanase<br>GH16 | 150678 F                    | GCCAACAAGCAGGGTATCT             |
|                       | 150678 R                    | GATGTCGATCTCACCACAGTT           |
|                       | 101233 R                    | GTC AAT CTC CTG GGT GTC ATT     |
|                       | 101233 F                    | GCG AGG AAG GAC TTG CAT TA      |
|                       | 513507 R                    | CCG CTG CTA CGA TAG TTG TT      |
|                       | 513507 F                    | CAC TGG CGG AGC TAT GAT ATT     |
|                       | 99201 R                     | GGC AGG TTG TTC CAC TTC T       |
|                       | 99201 F                     | GGG AGA GCA TCA AGG TTA CTG     |
|                       | 513340 R                    | TTT GGA TAC CAG GCG TTG AG      |
|                       | 513340 F                    | GGC CGC TAT CTC ATT CTA CAT C   |
|                       | 512534 R                    | GAG TCC AAG ACT GGA TGG ATT C   |
|                       | 512534 F                    | AAC CAG GAG CTC GAG ACT TA      |
|                       | 486218 R                    | CAC CTC CTT GGT CCA AAT ACT C   |
|                       | 486218 F                    | CTG GCT ATT TCC GGC TTC TT      |
|                       | 84167 R                     | CAG ACT TGA GGA CAA TAG CAG TAA |
|                       | 84167 F                     | CCC ACT CTA ACC AGC AAC AA      |
|                       | 15669 R                     | TTG GAA CCT CAC CCT TCA TTA C   |
|                       | 15669 F                     | GCC GTC CTG TAC GAT ATG ATT T   |
|                       | 15000 R                     | GAA GAG TCG CTG CTG TCA T       |
|                       | 15000 F                     | CAA GAG CGT CAA GGA GTA CAT     |
|                       | 78123 R                     | CTC GTA ATG TCA GAG GGA ATG G   |
|                       | 78123 F                     | TGG CTC GGA TTA CAA CAA GAA     |
|                       | 2738 R                      | CGT ACA CAT CGA TCT CTC CAT C   |
|                       | 2738 F                      | CCC ACC TGC CTA CCA ATA AG      |
|                       | 503986 R                    | GCA CCT AGC CAC TCC AAA T       |
|                       | 503986 F                    | CGT GTT GAA GTC ACC ATG AAA G   |
|                       | 1670 R                      | TCC CGG CAT ATG AGC AAT ATC     |
|                       | 1670 F                      | TTA TGG GCG TCG ATT ACA CTA C   |
|                       | 503766 R                    | GTG GCA TCT CGG TAT GTG AA      |
|                       | 503766 F                    | CAG ACA AAG ACG TCG GAC TAC     |
|                       | 503062 R                    | GCC ACC TCA GTA ATC GTC TTA G   |
|                       | 503062 F                    | TAC TGT GTA CGG CTG TGT TG      |
| 97567 R               | CGG ATG TTG TCG TAG GTG TAG |                                 |
| 97567 F               | CAT CCA GAA GAA CGG CTA CTT |                                 |
| Chitynsinase          | 766590_ThF                  | GGCTATATGGCGTTATCCTCATC         |
|                       | 766590_ThR                  | CCAGACCATGGCCGAATAAA            |
| Actin                 | Actin_F                     | GACATTTACGGCGGAGATGAG           |
|                       | Actin_R                     | AGGACGGCAGGATTGATTTG            |

**Supplementary Table S3.** Evaluation of antagonistic potential of *T.harzianum* wild and mutante strains against diferente plant pathogens, according to Bell et al.,1982.

| Lineages                                       | <i>R. solani</i> | <i>S. sclerotiorum</i> | <i>F. oxysporum</i> |
|------------------------------------------------|------------------|------------------------|---------------------|
| <i>T. harzianum</i> (wt)                       | 1 a              | 3 a                    | 3 a                 |
| <i>T. harzianum</i> ( $\Delta$ <i>gluc31</i> ) | 1 a              | 3 a                    | 3 a                 |
